# Supplementary material
Source: PubMed Central journal article supplement (PMC3177068)
Supplement: mmc1.pdf [file mmc1.pdf]

## **Dynamics of Calcium Sparks and Calcium Leak in the Heart**

George S. B. Williams,<sup>†‡</sup> Aristide C. Chikando,<sup>†‡</sup> Hoang-Trong M. Tuan,<sup>‡</sup> Eric A. Sobie,<sup>§</sup>  
W. J. Lederer,<sup>†</sup> and M. Saleet Jafri<sup>†‡</sup>

<sup>†</sup>BioMET, University of Maryland, Baltimore, Baltimore, Maryland; <sup>‡</sup>School of Systems Biology, George Mason University, Fairfax, Virginia; and <sup>§</sup>Department of Pharmacology, The Mount Sinai School of Medicine, New York, New York

## Supporting Material

### Tables

| Parameter                     | Definition                                       | Value                              |
|-------------------------------|--------------------------------------------------|------------------------------------|
| $V_{\text{cell}}$             | Cell volume                                      | 36.8 pL                            |
| $V_{\text{myo}}$              | Myoplasmic volume                                | 25.84 pL                           |
| $\lambda_{\text{nsr}}$        | NSR volume fraction                              | 0.0458                             |
| $\lambda_{\text{jsr}}$        | JSR volume fraction                              | 0.0130                             |
| $\lambda_{\text{ds}}$         | Subspace volume fraction                         | $1.55 \times 10^{-04}$             |
| $N$                           | Number of CRUs                                   | 20,000                             |
| $N_{\text{ryr}}$              | Number of RyRs per CRU                           | 49                                 |
| $[\text{Ca}^{2+}]_{\text{o}}$ | Extracellular $[\text{Ca}^{2+}]$                 | 1.8 mM                             |
| $[\text{Na}^{+}]_{\text{i}}$  | Intracellular $[\text{Na}^{+}]$                  | 10.2 mM                            |
| $[\text{Na}^{+}]_{\text{o}}$  | Extracellular $[\text{Na}^{+}]$                  | 140 mM                             |
| $\beta_{\text{ds}}$           | Subspace $\text{Ca}^{2+}$ buffering fraction     | 0.1                                |
| $\beta_{\text{nsr}}$          | NSR $\text{Ca}^{2+}$ buffering fraction          | 1                                  |
| $v_{\text{ryr}}^{\text{T}}$   | RyR $\text{Ca}^{2+}$ release rate                | $4.9194\text{e-}05 \text{ s}^{-1}$ |
| $v_{\text{ryr,nj}}$           | Rogue RyR release rate                           | $2.41 \text{ s}^{-1}$              |
| $\eta$                        | Cooperativity of $\text{Ca}^{2+}$ binding to RyR | 2.2                                |
| $a_*$                         | Average RyR allosteric connectivity              | 0.07                               |
| $\epsilon_{\text{cc}}$        | Change in free energy between closed RyR pairs   | -0.92 $\text{k}_\text{B}\text{T}$  |
| $\epsilon_{\text{oo}}$        | Change in free energy between open RyR pairs     | -0.85 $\text{k}_\text{B}\text{T}$  |

Table S1: Model Parameters

| Parameter        | Definition                                                      | Value                                     |
|------------------|-----------------------------------------------------------------|-------------------------------------------|
| $A_p$            | Concentration of SERCA molecules                                | 150 $\mu\text{M}$                         |
| $K_{d,i}$        | SERCA $[\text{Ca}^{2+}]_i$ sensitivity                          | 0.91 mM                                   |
| $K_{d,sr}$       | SERCA $[\text{Ca}^{2+}]_{sr}$ sensitivity                       | 2.24 mM                                   |
| $B_{myo}^T$      | Total myoplasmic $\text{Ca}^{2+}$ buffer concentration          | 143 $\mu\text{M}$                         |
| $K_m^{myo}$      | Half saturation constant for myoplasmic $\text{Ca}^{2+}$ buffer | 0.96 $\mu\text{M}$                        |
| $B_{jsr}^T$      | Total JSR $\text{Ca}^{2+}$ buffer concentration                 | $140 \times 10^2 \mu\text{M}$             |
| $K_m^{jsr}$      | Half saturation constant for JSR $\text{Ca}^{2+}$ buffer        | 638 $\mu\text{M}$                         |
| $F$              | Faraday constant                                                | $9.6485 \times 10^4$ coul $\mu\text{mol}$ |
| $T$              | Temperature                                                     | 310 K                                     |
| $R$              | Ideal gas constant                                              | 8314 J $\text{mM}^{-1}$ K <sup>-1</sup>   |
| $\bar{I}_{pmca}$ | Maximal PMCA current                                            | 0.75 pA pF <sup>-1</sup>                  |
| $K_{pmca}$       | $\text{Ca}^{2+}$ half saturation constant for PMCA              | 0.5 $\mu\text{M}$                         |
| $\bar{I}_{ncx}$  | Maximal NCX current                                             | 1000 pA pF <sup>-1</sup>                  |
| $g_{bca}$        | Maximal background $\text{Ca}^{2+}$ conductance                 | $7.36351 \times 10^{-4}$ mS $\mu\text{F}$ |
| $v_{refill}^T$   | Total JSR refill rate                                           | 5 s <sup>-1</sup>                         |
| $v_{efflux}^T$   | Total rate of $\text{Ca}^{2+}$ efflux out of the subspace       | 250 s <sup>-1</sup>                       |
| $k^+$            | RyR $\text{Ca}^{2+}$ association rate constant                  | 12 $\mu\text{M}^{-1}$ s <sup>-1</sup>     |
| $k^-$            | RyR $\text{Ca}^{2+}$ disassociation rate constant               | 500 s <sup>-1</sup>                       |
| $\phi_m$         | Luminal $\text{Ca}^{2+}$ regulation coefficient                 | $2.3 \times 10^{-4} \mu\text{M}^{-1}$     |
| $\phi_b$         | Luminal $\text{Ca}^{2+}$ regulation coefficient                 | $2.0 \times 10^{-2}$                      |
| $\eta_{ncx}$     | NCX voltage dependence coefficient                              | 0.35                                      |
| $K_{ncx,ca}$     | $\text{Ca}^{2+}$ half saturation constant for NCX               | 1380 $\mu\text{M}$                        |
| $K_{ncx,na}$     | $\text{Na}^+$ half saturation constant for NCX                  | 87500 $\mu\text{M}$                       |
| $k_{ncx}^{sat}$  | NCX exchange saturation factor                                  | 0.1                                       |
| $A_m$            | Capacitative area of cell membrane                              | $1.5340 \times 10^{-4} \mu\text{F}$       |
| $V$              | Membrane voltage                                                | -85 mV                                    |

Table S2: Model Parameters, cont.

| Parameter                | Definition                         | Value |
|--------------------------|------------------------------------|-------|
| $[\text{Ca}^{2+}]_i$     | myoplasmic $[\text{Ca}^{2+}]$      | 90 nM |
| $[\text{Ca}^{2+}]_{ds}$  | dyadic subspace $[\text{Ca}^{2+}]$ | 90 nM |
| $[\text{Ca}^{2+}]_{nsr}$ | network SR $[\text{Ca}^{2+}]$      | 1 mM  |
| $[\text{Ca}^{2+}]_{jsr}$ | junctional SR $[\text{Ca}^{2+}]$   | 1 mM  |
| $\pi_{ryr,nj}^o$         | fraction of open “rogue” RyR       | 0     |

Table S3: Initial Conditions

## Concentration Balance Equations

The Markov chain Monte Carlo model used here consists of  $2N+2$  ( $N = 20,000$ ) ordinary differential equations (ODEs) representing the time-evolution of  $[Ca^{2+}]$  in the bulk myoplasm ( $[Ca^{2+}]_i$ ), NSR ( $[Ca^{2+}]_{nsr}$ ), the  $N$  JSR ( $[Ca^{2+}]_{jsr}$ ) and dyadic subspace ( $[Ca^{2+}]_{ds}$ ) compartments, and  $N$  Markov chains representing the stochastic RyR clusters. Consistent with Fig. 1A, the concentration balance equations are

$$\frac{d[Ca^{2+}]_i}{dt} = \beta_{myo} (J_{efflux}^T - J_{ncx} - J_{serca} + J_{bca} - J_{pmca} + J_{ryr,nj}) \quad (S1)$$

$$\frac{d[Ca^{2+}]_{nsr}}{dt} = \frac{\beta_{nsr}}{\lambda_{nsr}} (J_{serca} - J_{refill}^T - J_{ryr,nj}) \quad (S2)$$

$$\frac{d[Ca^{2+}]_{jsr}^i}{dt} = \frac{\beta_{jsr}^i}{\lambda_{jsr}^i} (J_{refill}^i - J_{ryr}^i) \quad (S3)$$

$$\frac{d[Ca^{2+}]_{ds}^i}{dt} = \frac{\beta_{ds}}{\lambda_{ds}} (J_{ryr}^i - J_{efflux}^i) \quad (S4)$$

where  $\lambda_{nsr}$ ,  $\lambda_{jsr}$ , and  $\lambda_{ds}$  are the fraction of myoplasmic volume for the NSR, JSR, and dyadic subspace, respectively.  $\beta_{ds}$  and  $\beta_{nsr}$  are constant fraction buffering constants for the dyadic subspace and NSR, respectively.  $\beta_{jsr}^i$  and  $\beta_{myo}$  are dynamic buffering fractions for the JSR and myoplasm, respectively (see Supporting Material). The superscript  $i$  in Eqs. S3 and S4 denotes the  $i$ -th subspace ( $1 \leq i \leq N$ ). The flux through the RyR cluster associated with the  $i$ -th CRU is given by

$$J_{ryr}^i = N_o^i v_{ryr} ([Ca^{2+}]_{jsr}^i - [Ca^{2+}]_{ds}^i) \quad (S5)$$

where  $v_{ryr}$  is the RyR  $Ca^{2+}$  release rate in  $s^{-1}$  and  $N_o^i$  is the number of open RyR channels at the  $i$ -th release site. Similar to previous work (24, 25) model parameters lead to rapid equilibrium of  $[Ca^{2+}]_{ds}$  with the  $[Ca^{2+}]_i$  and  $[Ca^{2+}]_{jsr}$  allowing  $[Ca^{2+}]_{ds}$  to be approximated using an algebraic expression of  $[Ca^{2+}]_i$ ,  $[Ca^{2+}]_{jsr}$ , and  $N_o$  (see Eq. S23). The total  $Ca^{2+}$  flux from the NSR to JSR compartments and the total  $Ca^{2+}$  flux from the dyadic subspaces to the bulk myoplasm are given by  $J_{refill}^T$  and  $J_{efflux}^T$ , respectively.

## Allosteric Coupling Formulation

Combining 49 identical two-state RyRs into a cluster and assuming they are instantaneously coupled via  $[Ca^{2+}]_{ds}$  yields a  $M = 50$  state release site where each state indicates the number of open RyRs ( $N_o$ ) for the CRU ( $0 \leq N_o \leq 49$ ) as shown in Fig. 1C where terms on the arrows are transition rates. In these rate terms,  $\chi_{oc}$  and  $\chi_{co}$  represent ‘‘mean-field’’ allosteric coupling factors (18) given by

$$\chi_{oc} = \exp \{ -a_* [N_c \epsilon_{cc} - (N_o - 1) \epsilon_{oo}] \} \quad (S6)$$

$$\chi_{co} = \exp \{ -a_* [N_o \epsilon_{oo} - (N_c - 1) \epsilon_{cc}] \} \quad (S7)$$

where  $a_*$  represents the average allosteric connectivity (based on a  $7 \times 7$  grid with nearest neighbor coupling),  $\epsilon_{cc}$  is a dimensionless free energy of interaction (units of  $k_B T$ ) that specifies the change

in free energy experienced by a channel in state C when allosterically coupled to another channel in state C, and similarly for  $\epsilon_{oo}$ . The coefficients  $N_c$  (number of closed RyRs) and  $N_o$  serve to partition allosteric coupling between the forward and reverse transitions.

### Bulk Calcium Fluxes

The whole cell model of CICR that is the focus of this paper includes several fluxes that directly influence the dynamics of the bulk myoplasmic and NSR  $[Ca^{2+}]$  (see Eqs. S1 and S2) which, for brevity, are described below rather than in the text.

#### *Sarcoplasmic/Endoplasmic Reticulum $Ca^{2+}$ -ATPase*

The sarcoplasmic/endoplasmic reticulum  $Ca^{2+}$ -ATPase (SERCA) consumes ATP to pump  $Ca^{2+}$  into the SR from the myoplasm. Tran and co-workers (21) developed a thermodynamically realistic formulation of the SERCA pump along with a simplified “two-state” formulation that is implemented here. The SERCA pump flux takes the form,

$$J_{serca} = 2v_{cycle}A_p \quad (S8)$$

where  $A_p$  is the concentration of SERCA molecules ( $\mu M$ ) and  $v_{cycle}$  is the cycling rate ( $s^{-1}$ ) per pump molecule, given by

$$v_{cycle} = \frac{3.24873 \times 10^{12}K_i^2 + K_i(9.17846 \times 10^6 - 11478.2K_{sr}) - 0.329904K_{sr}}{D_{cycle}} \quad (S9)$$

where

$$D_{cycle} = 0.104217 + 17.923K_{sr} + K_i(1.75583 \times 10^6 + 7.61673 \times 10^6K_{sr}) + K_i^2(6.08463 \times 10^{11} + 4.50544 \times 10^{11}K_{sr})$$

and

$$K_i = \left( \frac{[Ca^{2+}]_i}{1 \times 10^{-3}K_{d,i}} \right)^2 \quad \text{and} \quad K_{sr} = \left( \frac{[Ca^{2+}]_{nsr}}{1 \times 10^{-3}K_{d,sr}} \right)^2$$

#### *$Na^+$ - $Ca^{2+}$ Exchanger*

The main pathway by which  $Ca^{2+}$  is extruded from the myocyte is the  $Na^+$ - $Ca^{2+}$  exchanger (NCX) which can be described as

$$J_{ncx} = \frac{-A_m I_{ncx}}{FV_{myo}} \quad (S10)$$

$$I_{ncx} = \bar{I}_{ncx} \frac{[Na^+]_i^3 [Ca^{2+}]_o e^{(\eta_{ncx} FV/RT)} - [Na^+]_o^3 [Ca^{2+}]_i e^{(\eta_{ncx}-1)FV/RT}}{\left( (K_{ncx,na})^3 + [Na^+]_o^3 \right) (K_{ncx,ca} + [Ca^{2+}]_o) (1 + k_{ncx}^{sat} e^{(\eta_{ncx}-1)FV/RT})} \quad (S11)$$

where  $\bar{I}_{ncx}$  is the maximal NCX current,  $[Ca^{2+}]_o$  is the extracellular  $[Ca^{2+}]$ , and  $[Na^+]_i$  and  $[Na^+]_o$  are the intracellular and extracellular  $[Na^+]$ , respectively. All other parameters are given in Table S3.

### Plasma Membrane $Ca^{2+}$ -ATPase

In addition to NCX the sarcolemma extrudes  $Ca^{2+}$  from the cell via a plasma membrane  $Ca^{2+}$ -ATPase flux (PMCA) of the form

$$J_{pmca} = \frac{-A_m I_{pmca}}{2FV_{myo}} \quad (S12)$$

$$I_{pmca} = \bar{I}_{pmca} \left( \frac{[Ca^{2+}]_i^2}{(K_{pmca})^2 + [Ca^{2+}]_i^2} \right) \quad (S13)$$

where  $\bar{I}_{pmca}$  is the maximal PMCA current.

### Sarcolemmal Background $Ca^{2+}$ Leak

The sarcolemma includes a constant background  $Ca^{2+}$  influx which balances  $J_{pmca}$  and  $J_{ncx}$  given by

$$J_{bca} = -\frac{A_m I_{bca}}{2FV_{myo}} \quad (S14)$$

$$I_{bca} = g_{bca} (V - E_{ca}) \quad (S15)$$

where  $g_{bca}$  is the maximal conductance and  $E_{ca}$  is the reversal potential for  $Ca^{2+}$ ,

$$E_{ca} = \frac{RT}{2F} \log \left( \frac{[Ca^{2+}]_o}{[Ca^{2+}]_i} \right) \quad (S16)$$

### Total JSR refill and dyadic subspace efflux terms

The total refill flux from the NSR to each JSR compartment includes the contribution from each CRU and is given by

$$J_{refill}^T = \sum_{i=1}^N J_{refill}^i = \sum_{i=1}^N \frac{v_{refill}^T}{N} ([Ca^{2+}]_{nsr} - [Ca^{2+}]_{jsr}^i). \quad (S17)$$

and similarly, the total flux out of the N dyadic subspaces into the bulk myoplasm is given by

$$J_{efflux}^T = \sum_{i=1}^N J_{efflux}^i = \sum_{i=1}^N \frac{v_{efflux}^T}{N} ([Ca^{2+}]_{ds}^i - [Ca^{2+}]_i). \quad (S18)$$

### Non-junctional RyR $Ca^{2+}$ Channels

The  $Ca^{2+}$  flux from non-junctional or ‘‘rogue’’ RyR  $Ca^{2+}$  flux is

$$J_{ryr,nj} = \pi_{ryr,nj}^0 v_{ryr,nj} ([Ca^{2+}]_{nsr} - [Ca^{2+}]_i). \quad (S19)$$

where  $v_{ryr,nj}$  is the total non-junctional RyR release rate in  $s^{-1}$  and  $\pi_{ryr,nj}^0$  is the fraction of open non-junctional RyRs and solves

$$\frac{d\pi_{ryr,nj}^0}{dt} = \phi k^+ (1 - \pi_{ryr,nj}^0) - k^- \pi_{ryr,nj}^0 \quad (S20)$$

where  $\phi = \phi_m[\text{Ca}^{2+}]_{\text{nsr}} + \phi_b$ ,  $k^+$  and  $k^-$  are transition rates for a individual RyR as presented in Fig. 1B.

## Dynamic Buffering Fractions

### *Myoplasmic Buffering*

Buffering in the myoplasm is approximated using a dynamic buffering fraction given by

$$\beta_{\text{myo}} = \left( 1 + \frac{B_{\text{myo}}^T K_m^{\text{myo}}}{(K_m^{\text{myo}} + [\text{Ca}^{2+}]_i)^2} \right)^{-1} \quad (\text{S21})$$

where  $B_{\text{myo}}^T$  is the total myoplasmic buffer concentration,  $K_m^{\text{myo}}$  is the half saturation constant for the myoplasmic buffer.

### *Junctional SR Buffering*

Buffering in each JSR compartment is approximated using a dynamic buffering fraction given by

$$\beta_{\text{jsr}}^i = \left( 1 + \frac{B_{\text{jsr}}^T K_m^{\text{jsr}}}{(K_m^{\text{jsr}} + [\text{Ca}^{2+}]_{\text{jsr}}^i)^2} \right)^{-1} \quad (\text{S22})$$

where  $B_{\text{jsr}}^T$  is the total JSR buffer concentration,  $K_m^{\text{jsr}}$  is the half saturation constant for the JSR buffer.

## Fast Subspace

Similar to previous work (24, 25) model parameters lead to rapid equilibrium of the  $[\text{Ca}^{2+}]_{\text{ds}}$  with the  $[\text{Ca}^{2+}]_i$  and  $[\text{Ca}^{2+}]_{\text{jsr}}$  (24). Thus, in each dyadic subspace we assume a  $[\text{Ca}^{2+}]$  ( $[\text{Ca}^{2+}]_{\text{ds,ss}}^i$ ) that balances the fluxes in and out of that compartment,

$$0 = \frac{\beta_{\text{ds}}}{\lambda_{\text{ds}}} \left( J_{\text{ryr}}^i - J_{\text{efflux}}^i \right) = \frac{\beta_{\text{ds}}}{\lambda_{\text{ds}}} \left( N_o^i v_{\text{ryr}} \left( [\text{Ca}^{2+}]_{\text{jsr}}^i - [\text{Ca}^{2+}]_{\text{ds}}^i \right) - v_{\text{efflux}} \left( [\text{Ca}^{2+}]_{\text{ds}}^i - [\text{Ca}^{2+}]_i \right) \right),$$

that is,

$$[\text{Ca}^{2+}]_{\text{ds,ss}}^i = \frac{v_{\text{efflux}} [\text{Ca}^{2+}]_i + N_o^i v_{\text{ryr}} [\text{Ca}^{2+}]_{\text{jsr}}^i}{v_{\text{efflux}} + N_o^i v_{\text{ryr}}} \quad (\text{S23})$$

where  $1 \leq i \leq N$  and  $v_{\text{efflux}} = v_{\text{efflux}}^T / N$ .

## Supplemental Figures

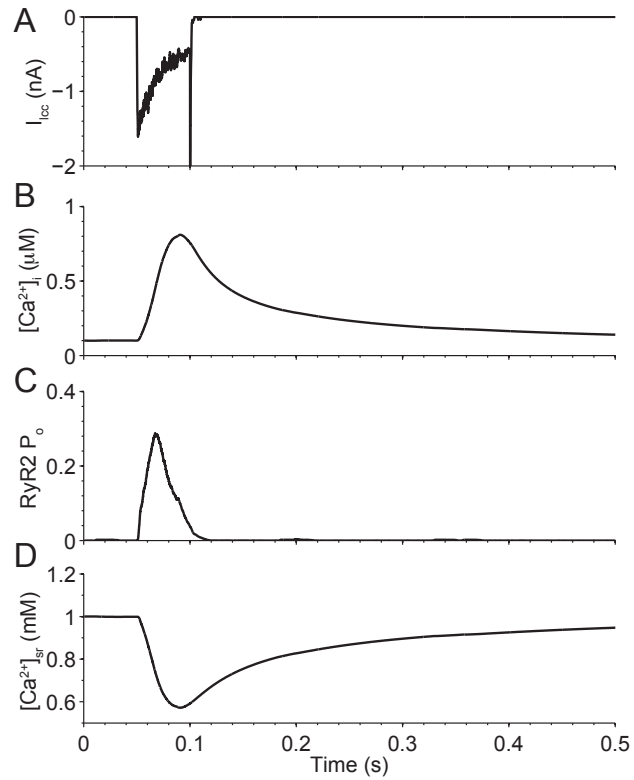

Figure S1: Whole-cell  $Ca^{2+}$  handling dynamics (A) LCC current induced from a 50 ms voltage pulse to 10 mV. (B) Bulk myoplasmic  $[Ca^{2+}]_i$ , (C) fraction of open RyRs, and (D) bulk SR  $[Ca^{2+}]_{sr}$ . Note,  $\sim 60\%$  of the CRUs are triggered during this simulation and each CRU contains 7 LCCs and 49 RyRs.



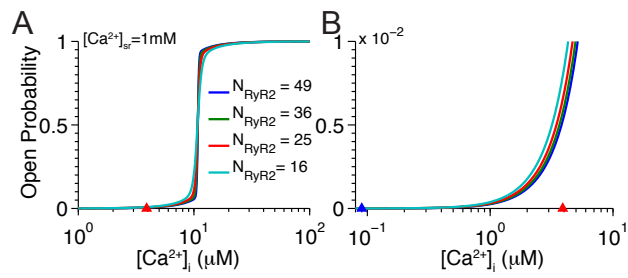

Figure S2: Influence of RyR cluster size ( $N_{RyR}$ ) on CRU  $P_o$ . (A)  $P_o$  for a clusters of varying size as a function of  $[Ca^{2+}]_i$  and (B)  $[Ca^{2+}]_{nsr}$ .

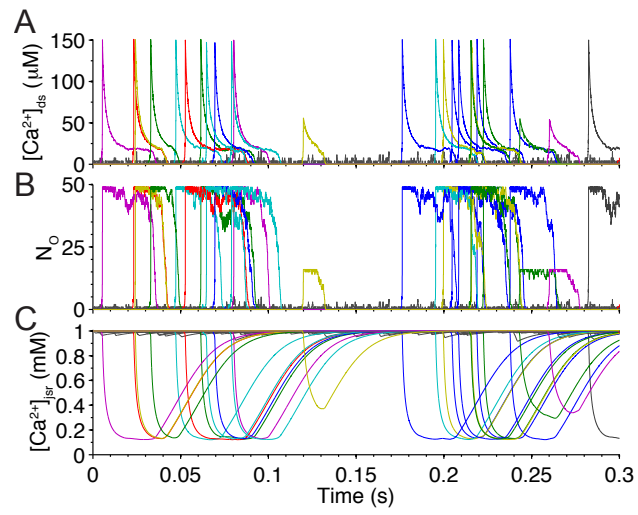

Figure S3:  $\text{Ca}^{2+}$  spark dynamics with heterogeneous cluster size. (A)  $[\text{Ca}^{2+}]_{\text{ds}}$  during spontaneous, diastolic  $\text{Ca}^{2+}$  release events resulting from clusters of 49 and 16 RyRs. (B)  $N_o$  at each CRU. (C)  $[\text{Ca}^{2+}]_{\text{jlr}}$  present on the luminal side of RyR cluster. Each colored line represents a different CRU.

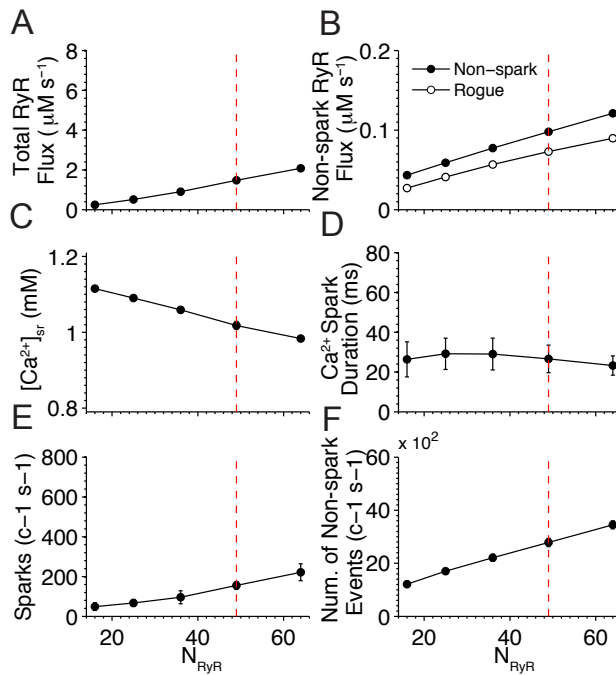

Figure S4: Influence of RyR cluster size ( $N_{\text{RyR}}$ ) on RyR based leak. (A) Total integrated RyR flux during a 1 second simulation, (B) integrated “non-spark” RyR flux via junctional RyRs (*solid line, filled circles*) and non-junctional RyRs (*solid line, open circles*), (C) steady-state  $[\text{Ca}^{2+}]_{\text{sr}}$ , (D) average  $\text{Ca}^{2+}$  spark duration, (E)  $\text{Ca}^{2+}$  spark rate, and (F) number of “non-spark” events versus  $[\text{Ca}^{2+}]_{\text{sr}}$ . The junctional “non-spark” flux is defined as RyR activity that doesn’t precede a  $\text{Ca}^{2+}$  spark. Data points represent the average over 10 simulations and error bars indicate standard deviation from the mean. Note,  $[\text{Ca}^{2+}]_{\text{i}}$  was held constant at 90 nM.

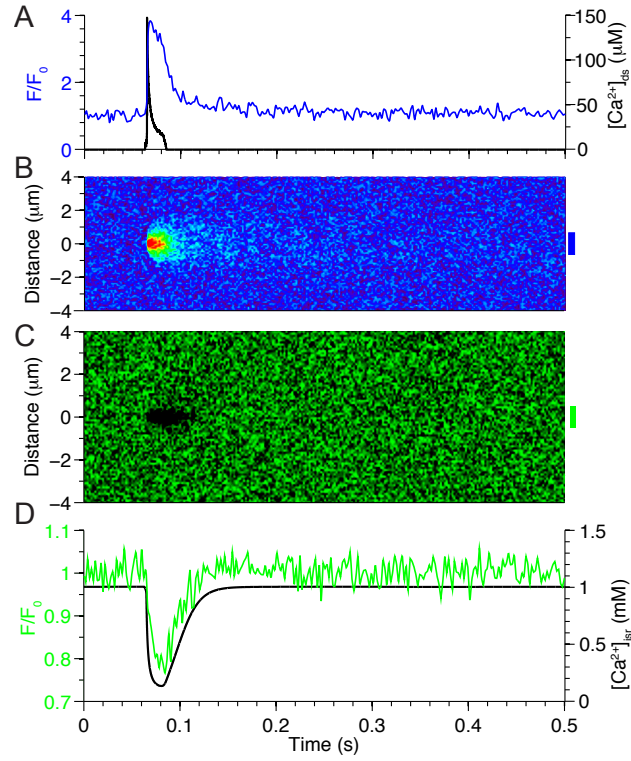

Figure S5: Dynamics of  $\text{Ca}^{2+}$  sparks and blinks. (A) Time course of  $[\text{Ca}^{2+}]_{\text{ds}}$  and the corresponding fluorescence profile ( $F/F_0$ ) of Fluo3 (blue line).  $F/F_0$  profile was obtained by averaging fluorescence from a  $1 \mu\text{m}$  wide region (blue box) in B. (B) Simulated linescan of  $\text{Ca}^{2+}$  spark. (C) Simulated linescan of  $\text{Ca}^{2+}$  blink. (D) Time course of  $[\text{Ca}^{2+}]_{\text{jst}}$  and the corresponding fluorescence profile ( $F/F_0$ ) of Fluo5N (blue line).  $F/F_0$  profile was obtained by averaging fluorescence from a  $1 \mu\text{m}$  wide region (green box) in C. Both simulated linescans based on previously published methods (see (16, 40)).

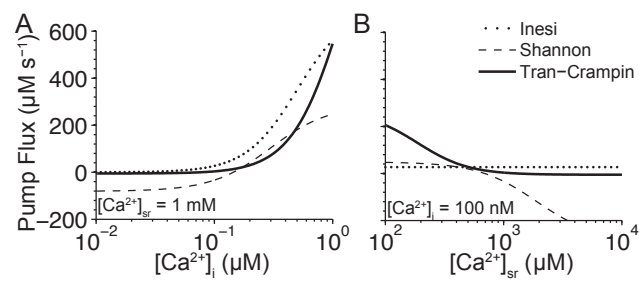

Figure S6: Comparison of SERCA2a pump flux versus (A)  $[\text{Ca}^{2+}]_i$  and (B)  $[\text{Ca}^{2+}]_{\text{sr}}$  for the three common model formulations; Tran-Crampin (*solid line*) (21), Shannon (*dashed line*) (41), and Inesi (*dotted line*) (42).
